# Supplementary material for: Mesangiogenic Progenitor Cells Derived from One Novel CD64brightCD31brightCD14neg Population in Human Adult Bone Marrow
Source: PubMed Central journal article supplement — Stem Cells Dev. 2016 Mar 15;25(9):661–73. doi: 10.1089/scd.2015.0344 (PMC4854213; doi:10.1089/scd.2015.0344), 2016-03-15
Supplement: Supp_Figure1.pdf [file Supp_Figure1.pdf]

## Supplementary Data

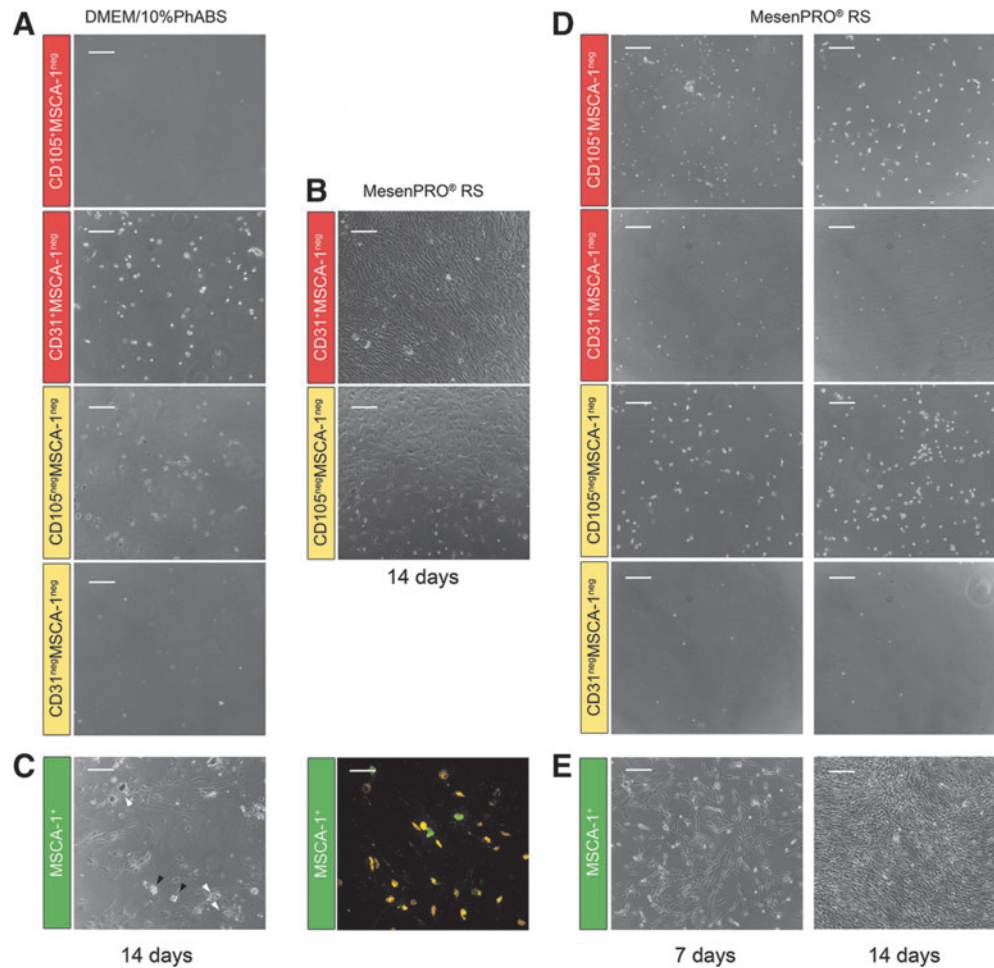

**SUPPLEMENTARY FIG. S1.** Culture properties of hBM immunomagnetic separated fractions. Within 14 days of culture in DMEM/10%PhABS, CD31<sup>+</sup>MSCA-1<sup>neg</sup>- and CD105<sup>neg</sup>MSCA-1<sup>neg</sup>-derived MPCs showed no change in proliferation and morphology (**A**). Growing these cells in MesenPRO<sup>®</sup> RS, a confluence of MSC-like cells, was generated after 14 days (**B**). Extended culture of MSCA-1<sup>+</sup> fraction in DMEM/10%PhABS resulted in spontaneous differentiation toward adipogenic or osteogenic lineages, as revealed by lipid droplet accumulation (*yellow*) (**C**) and calcium deposition (*green*) (**C**). Seeding hBM fractions directly in MesenPRO RS did not lead to any adherent cultures (**D**), except for the MSCA-1<sup>+</sup> fraction (**E**). DMEM; Dulbecco's modified Eagle's medium; hBM, human bone marrow; MPCs, mesodermal progenitor cells; MSC, mesenchymal stromal cell; PhABS, pooled human AB-type serum; RS, reduced serum.
