# Supplementary material for: Mesangiogenic Progenitor Cells Derived from One Novel CD64brightCD31brightCD14neg Population in Human Adult Bone Marrow
Source: PubMed Central journal article supplement — Stem Cells Dev. 2016 Mar 15;25(9):661–73. doi: 10.1089/scd.2015.0344 (PMC4854213; doi:10.1089/scd.2015.0344), 2016-03-15
Supplement: Supp_Figure2.pdf [file Supp_Figure2.pdf]

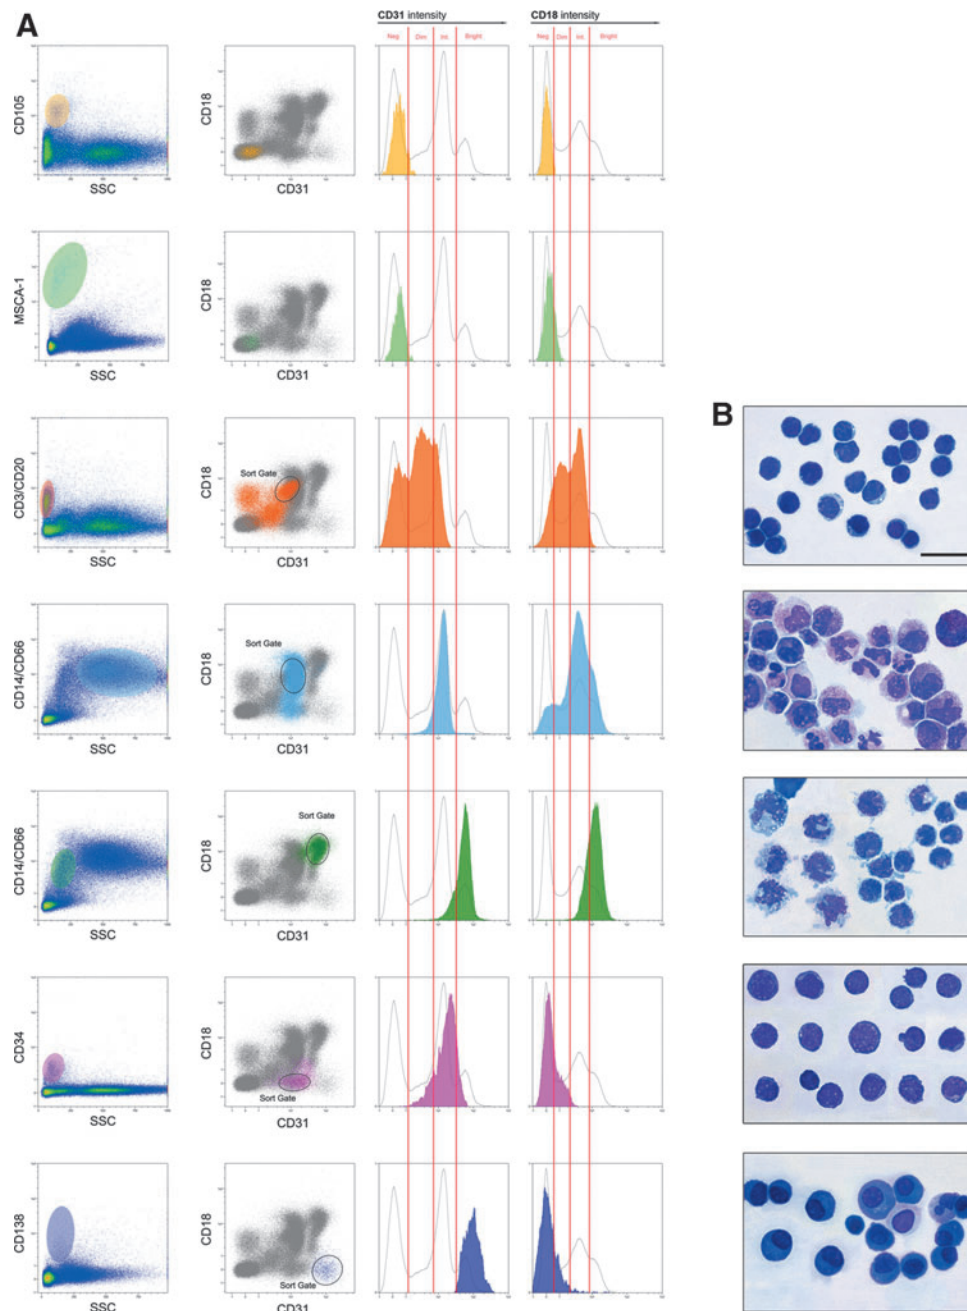

**SUPPLEMENTARY FIG. S2.** Distribution of hBM subpopulations in CD18 versus CD31 plot. Backgating of lineage markers allowed associating specific hBM subpopulations to different regions of CD18 versus CD31 plot (**A**). FACS sorting of all hBM subpopulations double positive counterpart (sort gate displayed) confirmed expected morphologies (**B**). FACS, fluorescence-activated cell sorting.
