# Supplementary material for: Mesangiogenic Progenitor Cells Derived from One Novel CD64brightCD31brightCD14neg Population in Human Adult Bone Marrow
Source: PubMed Central journal article supplement — Stem Cells Dev. 2016 Mar 15;25(9):661–73. doi: 10.1089/scd.2015.0344 (PMC4854213; doi:10.1089/scd.2015.0344), 2016-03-15
Supplement: Supp_Figure3.pdf [file Supp_Figure3.pdf]

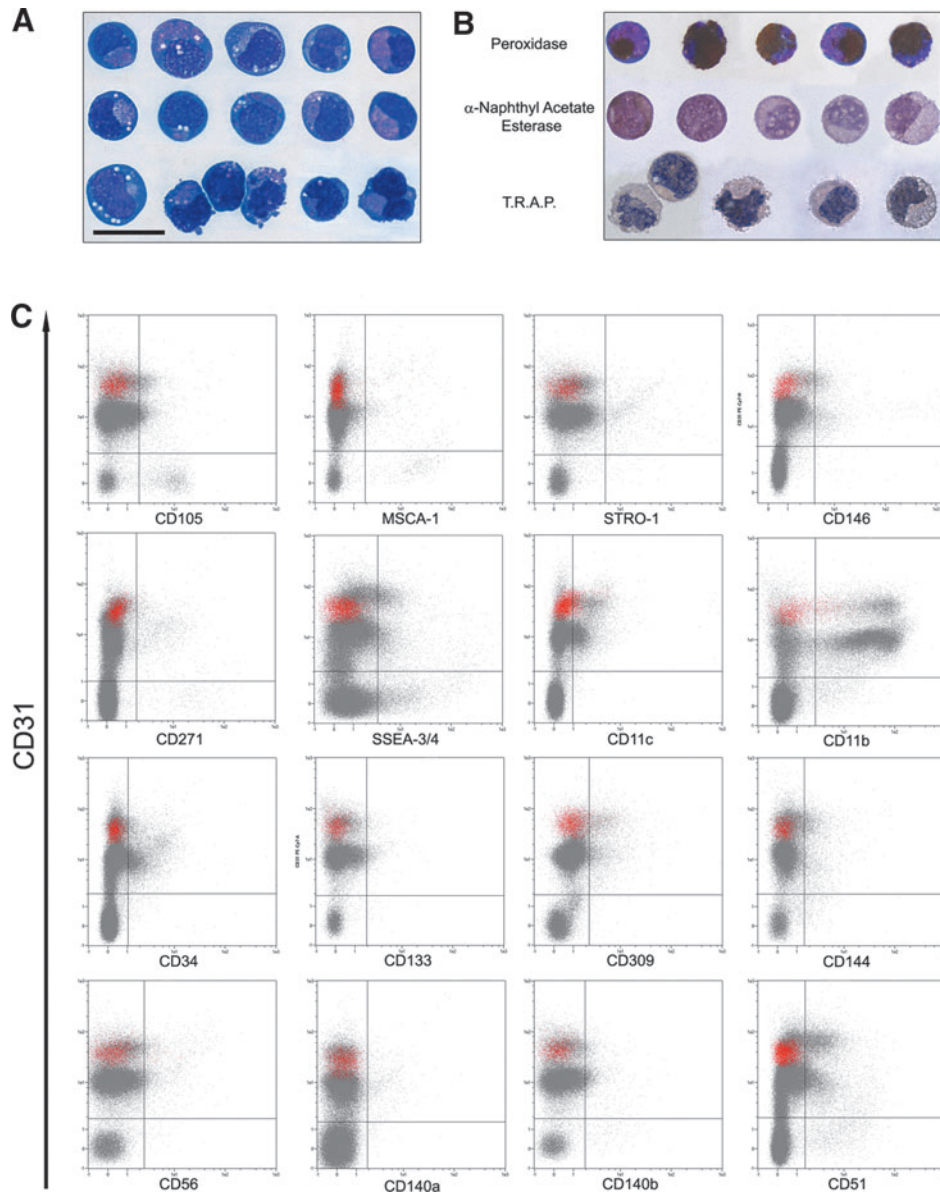

**SUPPLEMENTARY FIG. S3.** Characterization of *Pop#8*. Cytopsin of freshly sorted *Pop#8* revealed large cells with blastic appearance (**A**, scale bar: 50  $\mu$ m), showing intense peroxidase activity (**B**). *Pop#8* cells (*red dots*) (**C**) express no mesenchymal or endothelial-associated markers, which are usually detected in nonhematopoietic progenitors in vivo.
