# Supplementary material for: Mesangiogenic Progenitor Cells Derived from One Novel CD64brightCD31brightCD14neg Population in Human Adult Bone Marrow
Source: PubMed Central journal article supplement — Stem Cells Dev. 2016 Mar 15;25(9):661–73. doi: 10.1089/scd.2015.0344 (PMC4854213; doi:10.1089/scd.2015.0344), 2016-03-15
Supplement: Supp_Figure4.pdf [file Supp_Figure4.pdf]

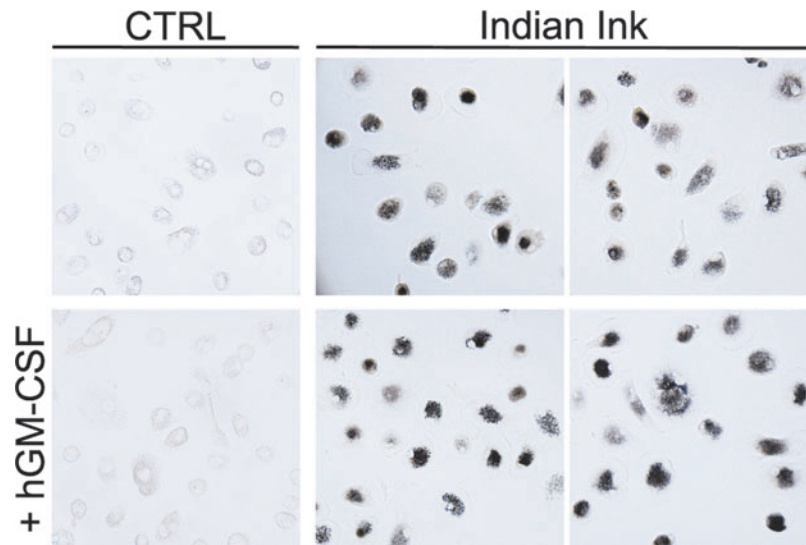

**SUPPLEMENTARY FIG. S4.** Mononuclear phagocyte differentiation. Phagocytic activity, revealed by Indian ink uptake (*black particles*), was detected in *Pop#8* cultured either in the presence (*lower panels*) or in the absence (*upper panels*) of hGM-CSF. hGM-CSF, human recombinant granulocyte/macrophage colony-stimulating factor.
