# Supplementary material for: Mesangiogenic Progenitor Cells Derived from One Novel CD64brightCD31brightCD14neg Population in Human Adult Bone Marrow
Source: PubMed Central journal article supplement — Stem Cells Dev. 2016 Mar 15;25(9):661–73. doi: 10.1089/scd.2015.0344 (PMC4854213; doi:10.1089/scd.2015.0344), 2016-03-15
Supplement: Supp_Figure5.pdf [file Supp_Figure5.pdf]

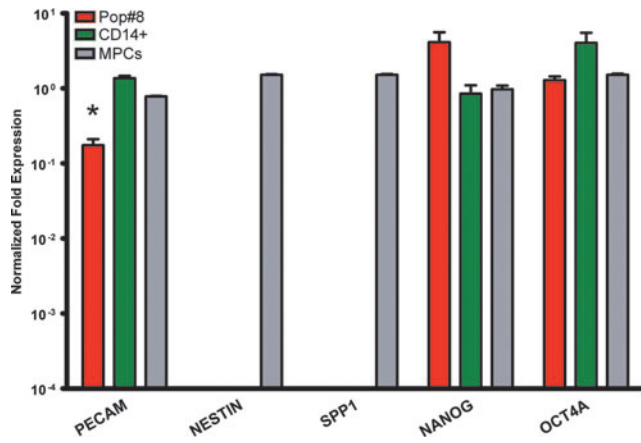

**SUPPLEMENTARY FIG. S5.** Gene expression analysis of freshly sorted Pop#8 versus cultured MPCs. Small differences were detected in the expression levels of MPC-associated genes with the exception of *NESTIN* and *SPP1* that were significantly upregulated in cultured MPCs (\* $p < 0.05$ ).
