# Supplementary material for: Mesangiogenic Progenitor Cells Derived from One Novel CD64brightCD31brightCD14neg Population in Human Adult Bone Marrow
Source: PubMed Central journal article supplement — Stem Cells Dev. 2016 Mar 15;25(9):661–73. doi: 10.1089/scd.2015.0344 (PMC4854213; doi:10.1089/scd.2015.0344), 2016-03-15
Supplement: Supp_Table1.pdf [file Supp_Table1.pdf]

SUPPLEMENTARY TABLE S1. SEQUENCE OF PRIMER PAIRS APPLIED FOR GENE EXPRESSION ANALYSIS

| <i>NCBI Ref#</i> | <i>Gene name</i>        |                   | <i>Primer pair</i>                              | <i>Amplicon length</i> |
|------------------|-------------------------|-------------------|-------------------------------------------------|------------------------|
| NM_000442        | <i>PECAM-1</i>          | <i>sense</i>      | GAACCTGTCCTGCTCCATC                             | 231 bp                 |
|                  |                         | <i>anti-sense</i> | TCAAACCTGGGCATCATAAGAAAT                        |                        |
| NM_024865        | <i>NANOG</i>            | <i>sense</i>      | GAACTCTCCAACATCCTGAACCTC                        | 127 bp                 |
|                  |                         | <i>anti-sense</i> | CCTTCTGCGTCACACCATTC                            |                        |
| NM_006617        | <i>NESTIN</i>           | <i>sense</i>      | GTTGGAACAGAGGTTGGAG                             | 250 bp                 |
|                  |                         | <i>anti-sense</i> | GAGGGAAGTCTTGGAGCC                              |                        |
| NM_001040060     | <i>SPP1</i>             | <i>sense</i>      | GCCGAGGTGATAGTGTGGTT                            | 101 bp                 |
|                  |                         | <i>anti-sense</i> | TGAGGTGATGTCTCGTCTG                             |                        |
| NM_002701        | <i>POU5F1</i> variant 1 | <i>sense</i>      | CCGTGAAGCTGGAGAAGGAGAAG                         | 198 bp                 |
|                  |                         | <i>anti-sense</i> | AGCGGCAGATGGTCGTTTGG                            |                        |
| NM_020404        | <i>CD248</i>            | <i>sense</i>      | CGAGTGTTATTGTAGCGA                              | 137 bp                 |
|                  |                         | <i>anti-sense</i> | CTTCATCTTCCTCATCCT                              |                        |
| NM_002046        | <i>GAPDH</i>            | <i>sense</i>      | CCCTTCATGACCTCAACTACATG                         | 115 bp                 |
|                  |                         | <i>anti-sense</i> | TGGGATTTCCATTGATGACAAGC                         |                        |
| NM_001686        | <i>ATP5B</i>            |                   | From Genorm Kit Human (Primerdesign L.t.d., UK) |                        |
